# Supplementary material for: Temperature-responsive methacrylamide polyampholytes
Source: Royal Society of Chemistry journal article supplement (doi:10.1039/c7ra04723a), 2017-01-01
Supplement: c7ra04723a1.pdf [file c7ra04723a1.pdf]

## Electronic Supplementary Information (ESI) document

### Temperature-responsive methacrylamide polyampholytes.

Lucy G. Weaver,<sup>a</sup> Regine Stockmann,<sup>a</sup> San H. Thang,<sup>b,c</sup> Almar Postma<sup>b\*</sup>

<sup>a</sup> CSIRO Agriculture and Food, Private Bag 16, Werribee, VIC 3030, Australia

<sup>b</sup> CSIRO Manufacturing, Bag 10, Clayton South, VIC 3169, Australia

<sup>c</sup> Monash University School of Chemistry, Clayton Campus, VIC 3800, Australia

\*Corresponding author: [almar.postma@csiro.au](mailto:almar.postma@csiro.au)

---

#### Table of contents.

|                                                                                                                                       |     |
|---------------------------------------------------------------------------------------------------------------------------------------|-----|
| 1. Polymer synthesis .....                                                                                                            | S1  |
| 2. Summary of the experimental parameters used during the synthesis of DMAPMAm- <i>stat</i> -MAA- <i>stat</i> -tBMAM copolymers ..... | S7  |
| 3. NMR spectra of polymers <b>A1-A8</b> .....                                                                                         | S8  |
| 4. Mole fraction of monomer vs. conversion of polymers <b>A1-A3</b> , <b>A5-A8</b> and <b>W1-W3</b> .....                             | S12 |
| 5. Temperature dependence of the transmittance (%) curves of polymers <b>A1-A8</b> at 2.5, 5.0 and 10.0 mg mL <sup>-1</sup> .....     | S14 |
| 6. T <sub>CP</sub> (°C) vs. molar ratio of tBMAM (%) of polymers <b>A5-A8</b> at 2.5, 5.0 and 10.0 mg mL <sup>-1</sup> .....          | S15 |
| 7. The <sup>1</sup> H NMR spectra of polymer <b>A8</b> in the presence and absence of salt at various temperatures .....              | S15 |

---

#### 1. Polymer synthesis

##### 1.1 Synthesis of P(DMAPMAm-*stat*-MAA-*stat*-tBMAM) copolymers (W1-W4)

DMAPMAm (5.13 g, 30.12 mmol), MAA (2.60 g, 30.18 mmol), tBMAM (0.69 g, 4.85 mmol), CETCPA (0.10 g, 0.33 mmol), ACVA (4.70 mg, 16.77 μmol) and the internal standard 1,3,5-trioxane (0.53 g, 5.85 mmol) were each added to volumetric flasks (10 mL, 5 mL, 5 mL, 5 mL, 1 mL, and 5 mL, respectively) and diluted with water. For tBMAM, CETCPA and ACVA, approximately 1 mL of EtOH was also added to each flask to help solubilise the components. Once the volumetric flasks had been made up to the mark

and shaken to form an homogeneous mixture, small portions of each stock solution were each added to 25 mL screw cap vials as shown in Table S1.

**Table S1.** Volumes of stock solutions added to reaction vessels during the synthesis of polymers **W1-W4**.

| Reaction  | DMAPMAM stock solution (mL) | MAA stock solution (mL) | tBMAM stock solution (mL) | CETCPA stock solution (mL) | ACVA stock solution (mL) | IS stock solution (mL) | Water (mL) |
|-----------|-----------------------------|-------------------------|---------------------------|----------------------------|--------------------------|------------------------|------------|
| <b>W1</b> | 2.59                        | 2.45                    | 2.31                      | 2.17                       | 0.24                     | 0.67                   | 1.85       |
| <b>W2</b> | 1.30                        | 1.23                    | 1.16                      | 1.09                       | 0.24                     | 0.67                   | 1.23       |
| <b>W3</b> | 0.00                        | 0.80                    | 1.59                      | 2.37                       | 0.24                     | 0.66                   | 0.62       |
| <b>W4</b> | 1.20                        | 1.19                    | 1.19                      | 1.18                       | 0.24                     | 0.66                   | 0.01       |

The contents of the vials were gently agitated to mix all components and a small aliquot was taken for NMR analysis (t=0 time point). A rubber septa was then fitted to the top of each vial and oxygen was removed *via* a nitrogen purge for 30 min. The vials were then placed in a temperature controlled oil bath that had been pre-heated to 70 °C for 19 h. After this time the vials were removed from the oil bath, cooled to room temperature and opened to air to quench the polymerisation. The resultant polymers were isolated by dialysis (SpectraPor tubing RC, MWCO 3.5 kDa) and were dialysed against Milli-Q grade water. Water was replaced 6 times over the course of the dialysis. Cleaned samples were then transferred to round bottomed flasks, frozen and then dried using a freeze dryer. All polymers were isolated as fluffy white solids. Monomer consumptions, overall polymer conversions and the ratio of monomers in the final polymers were calculated from <sup>1</sup>H NMR spectra by comparison of the integrals of the vinylic protons at the beginning and the end of polymerisations against the integral of the internal standard at ~5.2 ppm, as shown in Table 2 of the main manuscript.

### 1.2 Synthesis of P(DMAPMAM-*stat*-MAA-*stat*-tBMAM) copolymer (D1)

DMAPMAM (2.62 g, 15.38 mmol), MAA (1.32 g, 15.31 mmol), tBMAM (1.09 g, 7.73 mmol), CETCPA (59.0 mg, 192.12 μmol), ACVA (2.70 mg, 9.61 μmol) and the internal standard 1,3,5-trioxane (0.17 g, 1.92 mmol) were added to a 25 mL glass screw cap vial and 1,4-dioxane (5.0 g, 50 wt. %) was added. The mixture was gently agitated to solubilise all components and a small aliquot was taken for NMR analysis (t=0 time point). A rubber septa was then fitted to the top of the vial and oxygen was removed *via* a nitrogen purge for 30 min. The vial was then placed in a temperature controlled oil bath that had been pre-heated to 70 °C for 1.5 h. After this time it was observed that the reaction mixture was cloudy. The polymerisation was left for a further 17 h before the vial was removed from the oil bath, cooled to room temperature and opened to air to quench the polymerisation. At this point, the contents of the vial were completely solid, and so water was added try to solubilise all components for analysis by NMR to determine conversion. Due to the heterogeneous nature of the mixture and the insolubility of tBMAM in water, this analysis could not be completed. The resultant polymer was isolated by dialysis (SpectraPor tubing RC, MWCO 3.5 kDa) and was dialysed first against Milli-Q grade water, then 25% acetone/water (to help remove the large excess of

tBMAM), followed by Milli-Q grade water once more. Dialysate was replaced 6 times over the course of the dialysis. The polymer sample was then transferred to round bottomed flasks, frozen *via* immersion in liquid nitrogen and dried using a freeze dryer. The polymer **D1** was isolated as fluffy white solid. **D1**: 0.58 g (11.5% conversion). GPC:  $M_n$  7 700,  $M_w$  19 400,  $D$  2.50.

### 1.3 Synthesis of P(DMAPMAM-*stat*-MAA-*stat*-tBMAM) (D2)

DMAPMAM (2.27 g, 13.31 mmol), MAA (1.14 g, 13.33 mmol), tBMAM (1.65 g, 11.68 mmol), CETCPA (58.40 mg, 191.25  $\mu$ mol), ACVA (2.70 mg, 9.56  $\mu$ mol) and the internal standard 1,3,5-trioxane (170.8 mg, 1.91 mmol) were added to a 25 mL glass screw cap vial and 1,4-dioxane (5.0 g, 50 wt. %) was added. The mixture was gently agitated to solubilise all components and a small aliquot was taken for NMR analysis (t=0 time point). A rubber septa was then fitted to the top of the vial and oxygen was removed *via* a nitrogen purge for 30 min. The vial was then placed in a temperature controlled oil bath that had been pre-heated to 70 °C for 1.5 h. After this time it was observed that the reaction mixture was cloudy. The polymerisation was left for a further 17 h before the vial was removed from the oil bath, cooled to room temperature and opened to air to quench the polymerisation. At this point, the contents of the vial were completely solid, and so water was added try to solubilise all components for analysis by NMR. Due to the heterogeneous nature of the mixture and the insolubility of various components in water, this analysis could not be completed. The resultant polymer was isolated by dialysis (SpectraPor tubing RC, MWCO 3.5 kDa) and was dialysed first against Milli-Q grade water, then 25% acetone/water (to help remove the large excess of tBMAM), followed by Milli-Q grade water once more. Dialysate was replaced 6 times over the course of the dialysis. The polymer sample was then transferred to round bottomed flasks, frozen *via* immersion in liquid nitrogen and dried using a freeze dryer. The polymer **D2** was isolated as fluffy white solid. **D2**: 0.56 g (11.1% conversion). GPC:  $M_n$  7 700,  $M_w$  20 100,  $D$  2.59.

### 1.4 Synthesis of P(DMAPMAM-*stat*-MAA-*stat*-tBMAM) (D3)

DMAPMAM (1.92 g, 11.29 mmol), MAA (0.97 g, 11.23 mmol), tBMAM (2.11 g, 14.94 mmol), CETCPA (58.0 mg, 187.29  $\mu$ mol), ACVA (2.6 mg, 9.36  $\mu$ mol) and the internal standard 1,3,5-trioxane (171.6 mg, 1.87 mmol) were added to a 25 mL glass screw cap vial and 1,4-dioxane (5.0 g, 50 wt. %) was added. The mixture was gently agitated to solubilise all components and a small aliquot was taken for NMR analysis (t=0 time point). A rubber septa was then fitted to the top of the vial and oxygen was removed *via* a nitrogen purge for 30 min. The vial was then placed in a temperature controlled oil bath that had been pre-heated to 70 °C for 1.5 h. After this time it was observed that the reaction mixture was cloudy. The polymerisation was left for a

further 17 h before the vial was removed from the oil bath, cooled to room temperature and opened to air to quench the polymerisation. At this point, the contents of the vial were completely solid, and so water was added try to solubilise all components for analysis by NMR. Due to the heterogeneous nature of the mixture and the insolubility of various components in water, this analysis could not be completed. The resultant polymer was isolated by dialysis (SpectraPor tubing RC, MWCO 3.5 kDa) and was dialysed first against Milli-Q grade water, then 25% acetone/water (to help remove the large excess of tBMAM), followed by Milli-Q grade water once more. Dialysate was replaced 6 times over the course of the dialysis. The polymer sample was then transferred to round bottomed flasks, frozen *via* immersion in liquid nitrogen and dried using a freeze dryer. The polymer **D3** was isolated as fluffy white solid. **D3**: 0.39 g (7.8% conversion). GPC:  $M_n$  6 500,  $M_w$  15 800,  $\bar{D}$  2.42.

### 1.5 Synthesis of P(DMAPMAM-*stat*-MAA-*stat*-tBMAM) (D4)

DMAPMAM (1.59 g, 9.32 mmol), MAA (0.80 g, 9.28 mmol), tBMAM (2.62 g, 18.56 mmol), CETCPA (57.30 mg, 185.78  $\mu$ mol), ACVA (2.50 mg, 9.29  $\mu$ mol) and the internal standard 1,3,5-trioxane (167.4 mg, 1.86 mmol) were added to a 25 mL glass screw cap vial and 1,4-dioxane (5.0 g, 50 wt. %) was added. The mixture was gently agitated to solubilise all components and a small aliquot was taken for NMR analysis ( $t=0$  time point). A rubber septa was then fitted to the top of the vial and oxygen was removed *via* a nitrogen purge for 30 min. The vial was then placed in a temperature controlled oil bath that had been pre-heated to 70 °C for 1.5 h. After this time it was observed that the reaction mixture was cloudy. The polymerisation was left for a further 17 h before the vial was removed from the oil bath, cooled to room temperature and opened to air to quench the polymerisation. At this point, the contents of the vial were completely solid, and so water was added try to solubilise all components for analysis by NMR. Due to the heterogeneous nature of the mixture and the insolubility of various components in water, this analysis could not be completed. The resultant polymer was isolated by dialysis (SpectraPor tubing RC, MWCO 3.5 kDa) and was dialysed first against Milli-Q grade water, then 25% acetone/water (to help remove the large excess of tBMAM), followed by Milli-Q grade water once more. Dialysate was replaced 6 times over the course of the dialysis. The polymer sample was then transferred to round bottomed flasks, frozen *via* immersion in liquid nitrogen and dried using a freeze dryer. The polymer **D4** was isolated as fluffy white solid. **D4**: 0.32 g (6.4 % conversion). GPC:  $M_n$  4 800,  $M_w$  11 500,  $\bar{D}$  2.40.

### 1.6 Synthesis of P(DMAPMAM-*stat*-MAA-*stat*-tBMAM) (A1-A4)

DMAPMAM (6.40 g, 37.62 mmol), MAA (3.24 g, 37.62 mmol), tBMAM (0.86 g, 6.07 mmol), CETCPA (0.12 g, 0.40 mmol), ACVA (5.70 mg, 20.33  $\mu$ mol) and the internal standard 1,3,5-trioxane (0.37 g, 4.07 mmol) were each added to volumetric flasks (10 mL,

5 mL, 5 mL, 5 mL, 1 mL, and 5 mL, respectively) and diluted with glacial acetic acid (AcOH). Particular care was taken during the addition of AcOH to the flask containing DMAPMAM, which was kept in an ice bath during this process. Once the volumetric flasks had been made up to the mark and shaken to form a homogeneous mixture, small portions of each stock solution were each added to 25 mL screw cap vials as shown in Table S2.

**Table S2.** Volumes of stock solutions added to reaction vessels during the synthesis of polymers **A1-A4**.

| Reaction  | DMAPMAM stock solution (mL) | MAA stock solution (mL) | tBMAM stock solution (mL) | CETCPA stock solution (mL) | ACVA stock solution (mL) | IS stock solution (mL) | Water (mL) |
|-----------|-----------------------------|-------------------------|---------------------------|----------------------------|--------------------------|------------------------|------------|
| <b>A1</b> | 2.59                        | 2.45                    | 2.31                      | 2.17                       | 0.24                     | 1.20                   | 3.28       |
| <b>A2</b> | 1.30                        | 1.23                    | 1.16                      | 1.09                       | 0.24                     | 1.19                   | 2.65       |
| <b>A3</b> | 0.00                        | 0.80                    | 1.59                      | 2.37                       | 0.24                     | 1.19                   | 2.04       |
| <b>A4</b> | 1.20                        | 1.19                    | 1.19                      | 1.18                       | 0.24                     | 1.18                   | 1.43       |

The contents of the vials were gently agitated to mix all components and a small aliquot was taken for NMR analysis ( $t=0$  time point). A rubber septa was then fitted to the top of each vial and oxygen was removed *via* a nitrogen purge for 30 min. The vials were then placed in a temperature controlled oil bath that had been pre-heated to 70 °C for 21 h. After this time the vials were removed from the oil bath, cooled to room temperature and opened to air to quench the polymerisation. The resultant polymers were isolated by dialysis (SpectraPor tubing RC, MWCO 3.5 kDa) and were dialysed against Milli-Q grade water. Water was replaced 6 times over the course of the dialysis. Cleaned samples were then transferred to round bottomed flasks, frozen and then dried using a freeze dryer. All polymers were isolated as fluffy white solids. Monomer consumptions, overall polymer conversions and the ratio of monomers in the final polymers were calculated from  $^1\text{H}$  NMR spectra by comparison of the integrals of the vinylic protons at the beginning and the end of polymerisations against the integral of the internal standard at  $\sim 5.2$  ppm, as shown in Table 2 of the main manuscript.

### 1.7 Synthesis of P(DMAPMAM-*stat*-MAA-*stat*-tBMAM) (A5-A8)

Four aliquots of DMAPMAM [(a) 1.86 g, 10.92 mmol; (b) 1.61 g, 9.46 mmol; (c) 1.40 g, 8.22 mmol; (d) 1.13 g, 6.64 mmol] were each added to a 25 mL screw capped vial and 1 mL of glacial acetic acid (AcOH) was added. Particular care was taken during the addition of AcOH to these flasks, which were cooled under running water immediately after the addition of AcOH. MAA (3.17 g, 36.82 mmol), tBMAM (5.75 g, 40.71 mmol), CETCPA (0.18 g, 0.60 mmol), ACVA (7.90 mg, 28.19  $\mu\text{mol}$ ) and the internal standard 1,3,5-trioxane (0.53 g, 5.91 mmol) were each added to volumetric flasks (10 mL, 25 mL, 5 mL, 1 mL, and 5 mL, respectively) and diluted with glacial acetic acid (AcOH). Once the volumetric flasks had been made up to the mark and shaken to form a homogeneous mixture, small portions of each stock solution were each added to the DMAPMAM-containing 25 mL screw cap vials as shown in Table S3.

**Table S3.** Volumes of stock solutions added to reaction vessels during the synthesis of polymers **A5-A8**.

| Reaction  | MAA stock solution (mL) | tBMAM stock solution (mL) | CETCPA stock solution (mL) | ACVA stock solution (mL) | IS stock solution (mL) | Water (mL) |
|-----------|-------------------------|---------------------------|----------------------------|--------------------------|------------------------|------------|
| <b>A5</b> | 2.97                    | 3.46                      | 1.21                       | 0.24                     | 1.21                   | 3.89       |
| <b>A6</b> | 2.57                    | 5.15                      | 1.20                       | 0.24                     | 1.20                   | 2.69       |
| <b>A7</b> | 2.18                    | 6.79                      | 1.19                       | 0.24                     | 1.19                   | 1.51       |
| <b>A8</b> | 1.80                    | 8.41                      | 1.17                       | 0.24                     | 1.17                   | 0.35       |

The contents of the vials were gently agitated to mix all components and a small aliquot was taken for NMR analysis ( $t=0$  time point). A rubber septa was then fitted to the top of each vial and oxygen was removed *via* a nitrogen purge for 30 min. The vials were then placed in a temperature controlled oil bath that had been pre-heated to 70 °C for 19 h. After this time, 0.2 mL of a stock solution of ACVA (8 mg in 0.8 mL glacial acetic acid; purged with nitrogen for 15 min) was added to each of the vials and the reaction continued until a total time of 24.5 h for **A5** and **A6**; and 26 h for **A7** and **A8** had been reached. After this time, the vials were removed from the oil bath, cooled to room temperature and opened to air to quench the polymerisation. The resultant polymers were isolated by dialysis (SpectraPor tubing RC, MWCO 3.5 kDa) and were dialysed against Milli-Q grade water. Water was replaced 6 times over the course of the dialysis. Cleaned samples were then transferred to round bottomed flasks, frozen and then dried using a freeze dryer. All polymers were isolated as fluffy white solids. Monomer consumptions, overall polymer conversions and the ratio of monomers in the final polymers were calculated from  $^1\text{H}$  NMR spectra by comparison of the integrals of the vinylic protons at the beginning and the end of polymerisations against the integral of the internal standard at  $\sim 5.2$  ppm, as shown in Table 2 of the main manuscript.

## 2. Summary of the experimental parameters used during the synthesis of DMAPMAm-*stat*-MAA-*stat*-tBMAm copolymers

**Table S4** Summary of the experimental parameters used during the synthesis of DMAPMAm-*stat*-MAA-*stat*-tBMAm copolymers **W1-W4**, **D1-D4** and **A1-A8** via RAFT polymerisation.

| Entry                | Starting monomer ratios |      |        | Reaction conditions |          | Polymer code |
|----------------------|-------------------------|------|--------|---------------------|----------|--------------|
|                      | %DMAP-MAm               | %MAA | %tBMAm | Solvent             | Time (h) |              |
| <b>1<sup>a</sup></b> | 50                      | 50   | 0      | H <sub>2</sub> O    | 19       | <b>W1</b>    |
| <b>2<sup>a</sup></b> | 47.5                    | 47.5 | 5      | H <sub>2</sub> O    | 19       | <b>W2</b>    |
| <b>3<sup>a</sup></b> | 45                      | 45   | 10     | H <sub>2</sub> O    | 19       | <b>W3</b>    |
| <b>4<sup>a</sup></b> | 42.5                    | 42.5 | 15     | H <sub>2</sub> O    | 19       | <b>W4</b>    |
| <b>5<sup>b</sup></b> | 40                      | 40   | 20     | 1,4-dioxane         | 18.5     | <b>D1</b>    |
| <b>6<sup>b</sup></b> | 35                      | 35   | 30     | 1,4-dioxane         | 18.5     | <b>D2</b>    |
| <b>7<sup>b</sup></b> | 30                      | 30   | 40     | 1,4-dioxane         | 18.5     | <b>D3</b>    |
| <b>8<sup>b</sup></b> | 25                      | 25   | 50     | 1,4-dioxane         | 18.5     | <b>D4</b>    |
| <b>9</b>             | 50                      | 50   | 0      | AcOH                | 21       | <b>A1</b>    |
| <b>10</b>            | 47.5                    | 47.5 | 5      | AcOH                | 21       | <b>A2</b>    |
| <b>11</b>            | 45                      | 45   | 10     | AcOH                | 21       | <b>A3</b>    |
| <b>12</b>            | 42.5                    | 42.5 | 15     | AcOH                | 21       | <b>A4</b>    |
| <b>13</b>            | 40                      | 40   | 20     | AcOH                | 24.5     | <b>A5</b>    |
| <b>14</b>            | 35                      | 35   | 30     | AcOH                | 24.5     | <b>A6</b>    |
| <b>15</b>            | 30                      | 30   | 40     | AcOH                | 26       | <b>A7</b>    |
| <b>16</b>            | 25                      | 25   | 50     | AcOH                | 26       | <b>A8</b>    |

<sup>a</sup> Trace amounts of EtOH was needed to solubilise some starting materials; <sup>b</sup> Precipitate formed after 1-2 h.

### 3. NMR spectra of polymers A1-A8

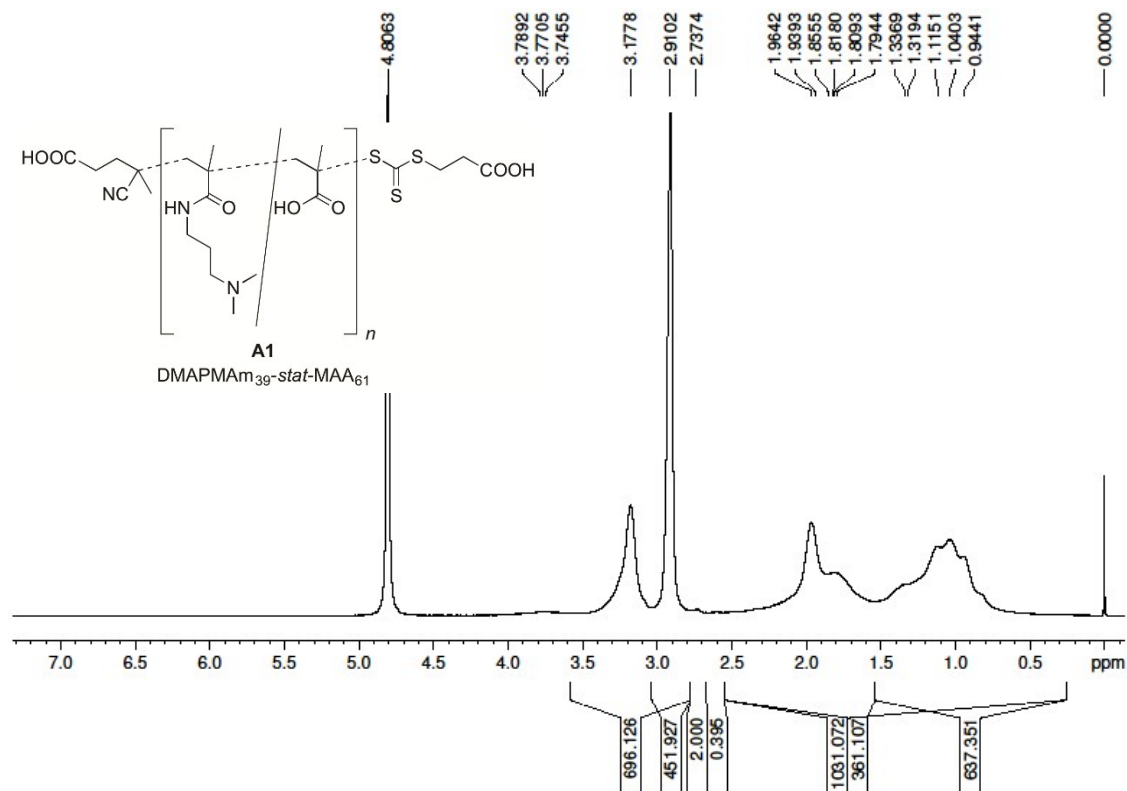

Fig. S1  $^1\text{H}$  NMR spectrum of polymer A1 (D<sub>2</sub>O).

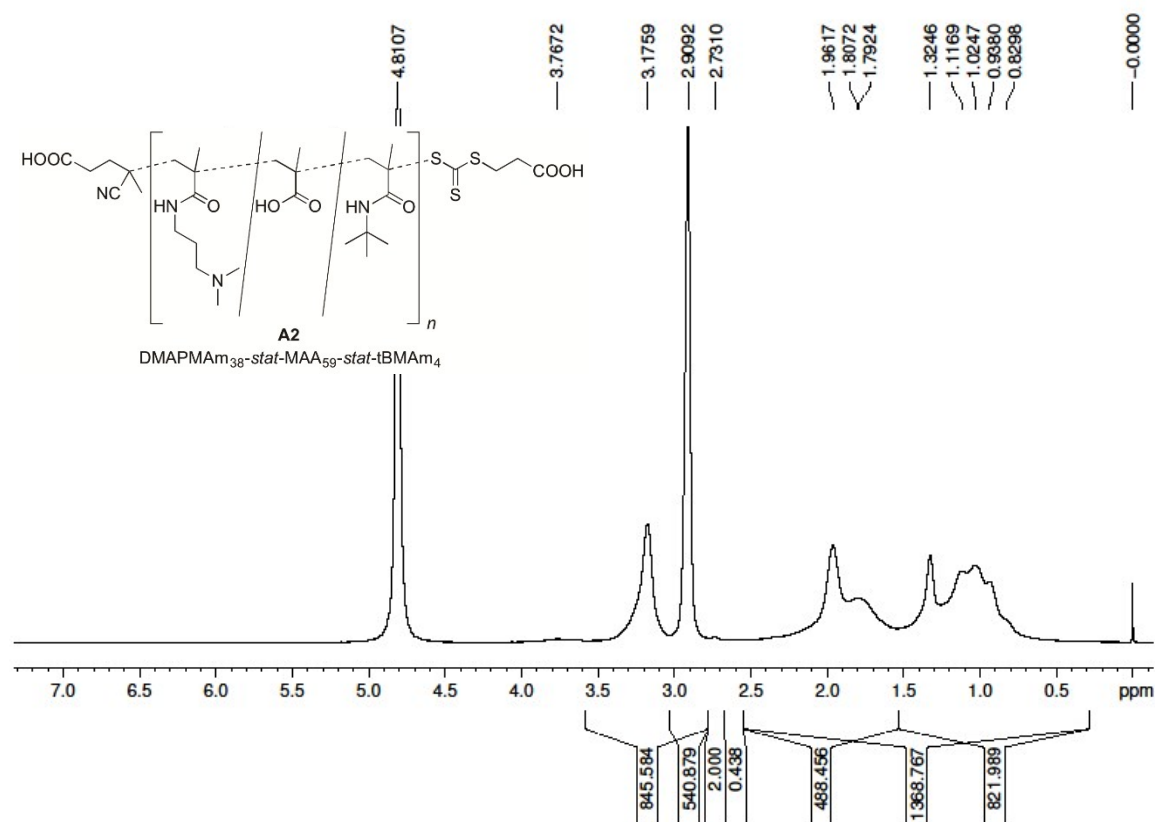

Fig. S2  $^1\text{H}$  NMR spectrum of polymer A2 (D<sub>2</sub>O).



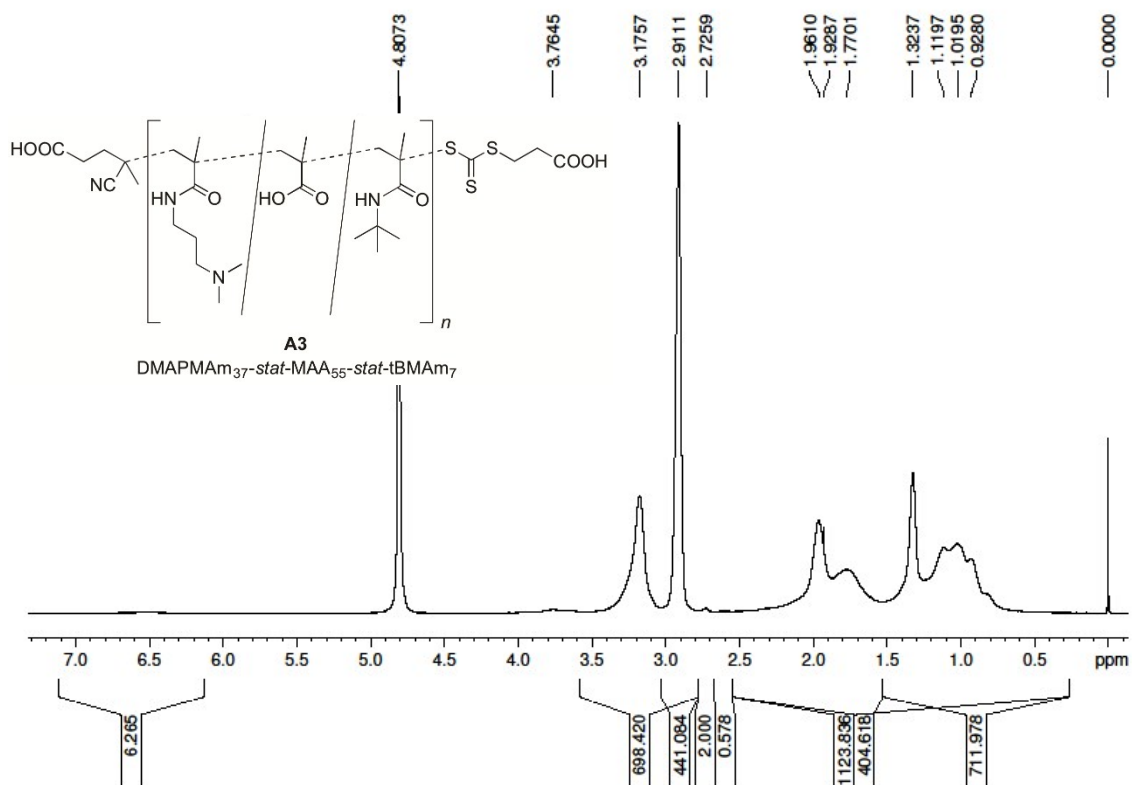

Fig. S3  $^1\text{H NMR}$  spectrum of polymer A3 ( $\text{D}_2\text{O}$ ).

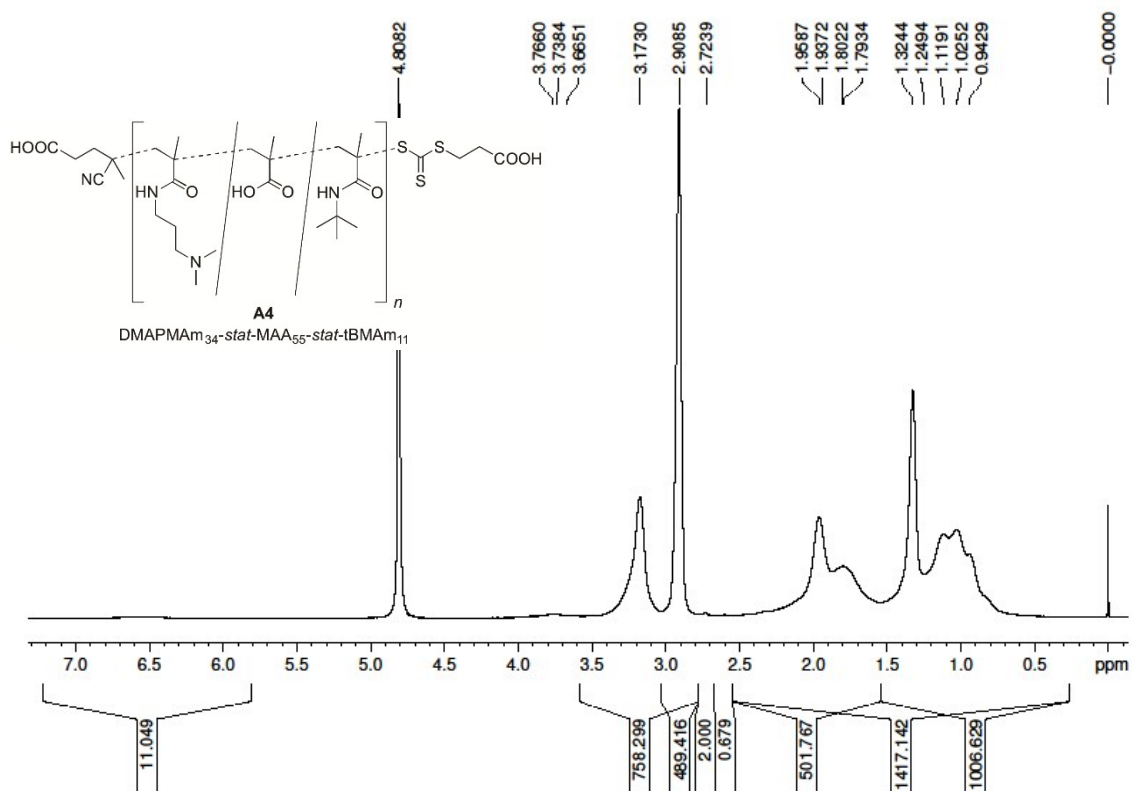

Fig. S4  $^1\text{H NMR}$  spectrum of polymer A4 ( $\text{D}_2\text{O}$ ).

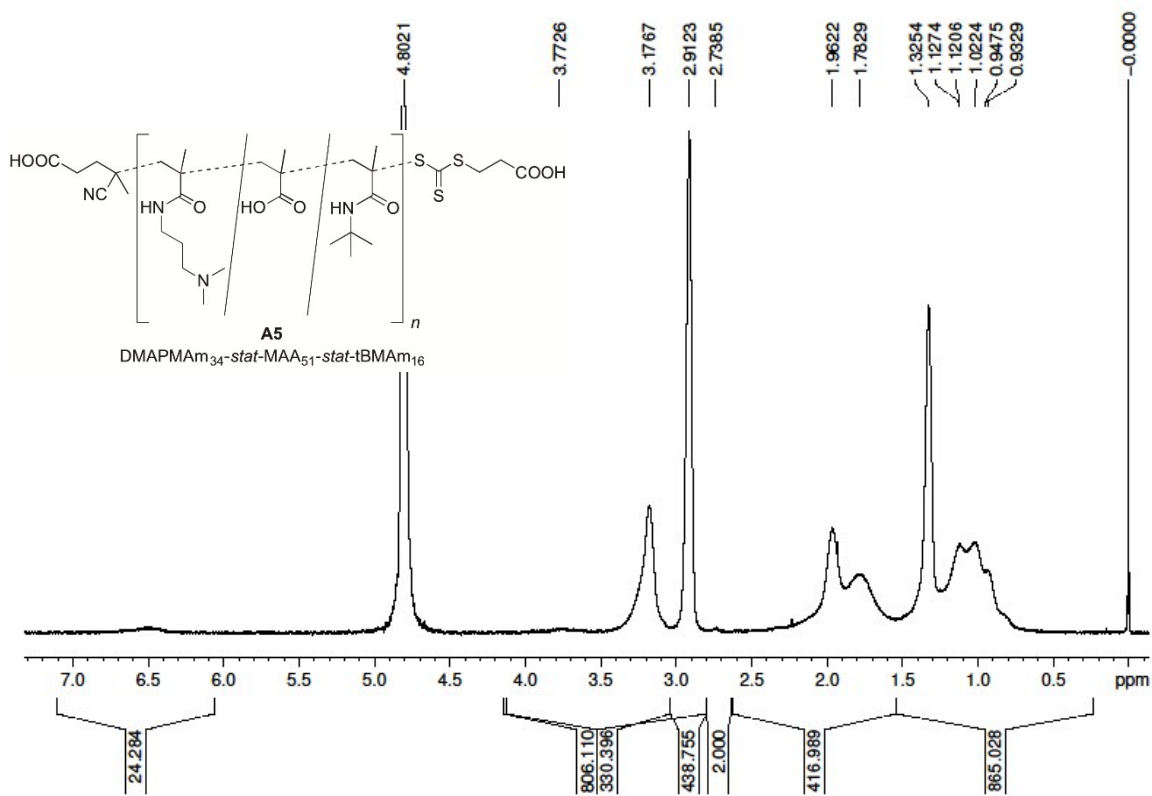

Fig. S5  $^1\text{H}$  NMR spectrum of polymer A5 ( $\text{D}_2\text{O}$ ).

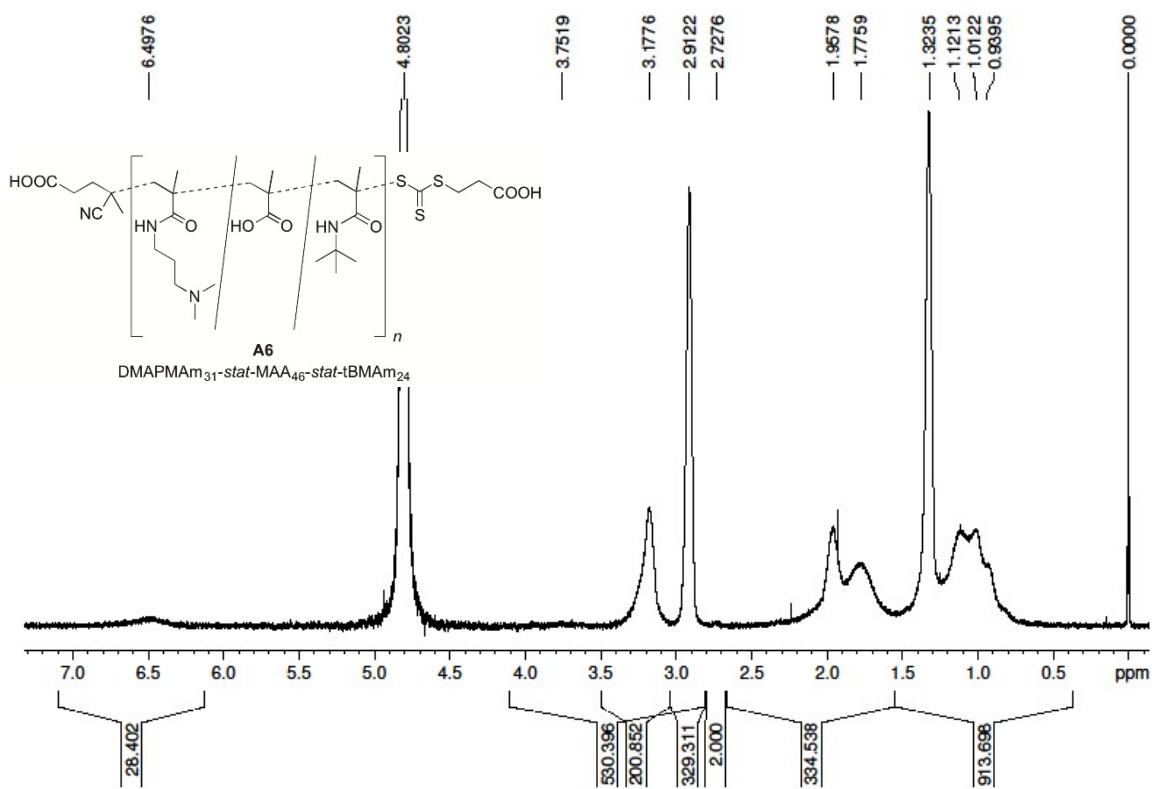

Fig. S6  $^1\text{H}$  NMR spectrum of polymer A6 ( $\text{D}_2\text{O}$ ).

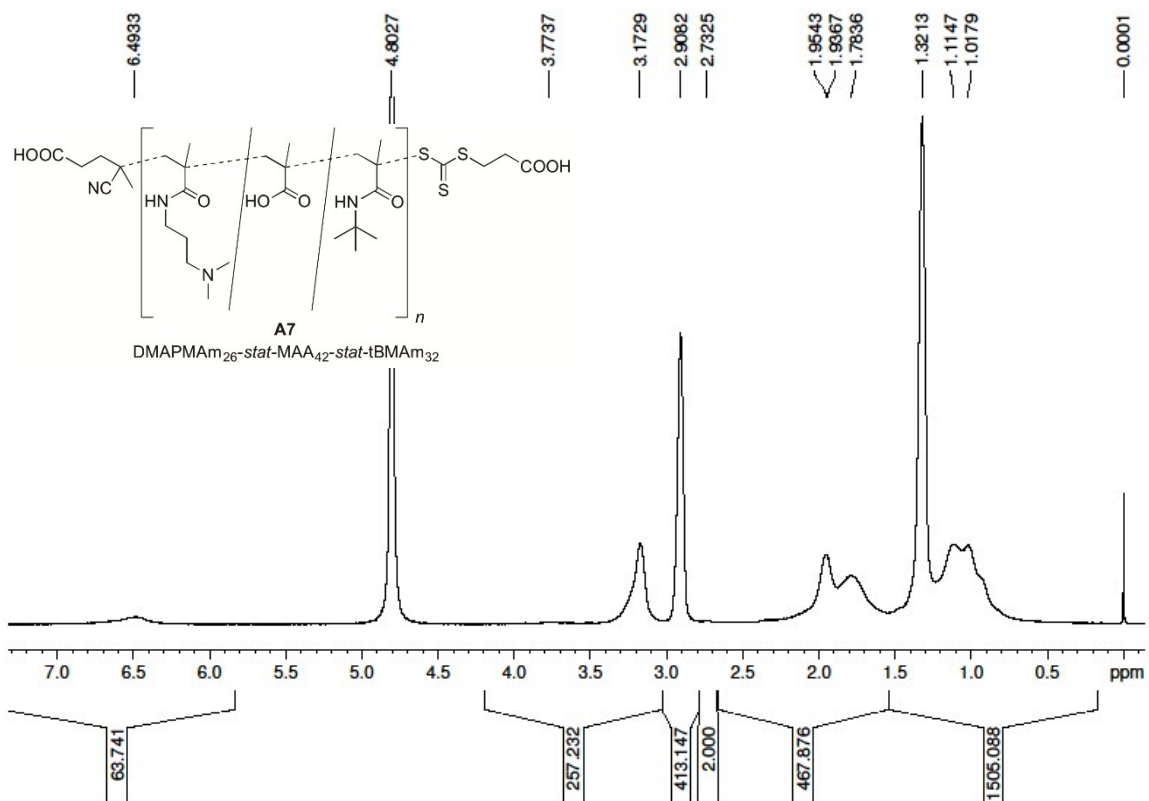

Fig. S7  $^1\text{H}$  NMR spectrum of polymer A7 ( $\text{D}_2\text{O}$ ).

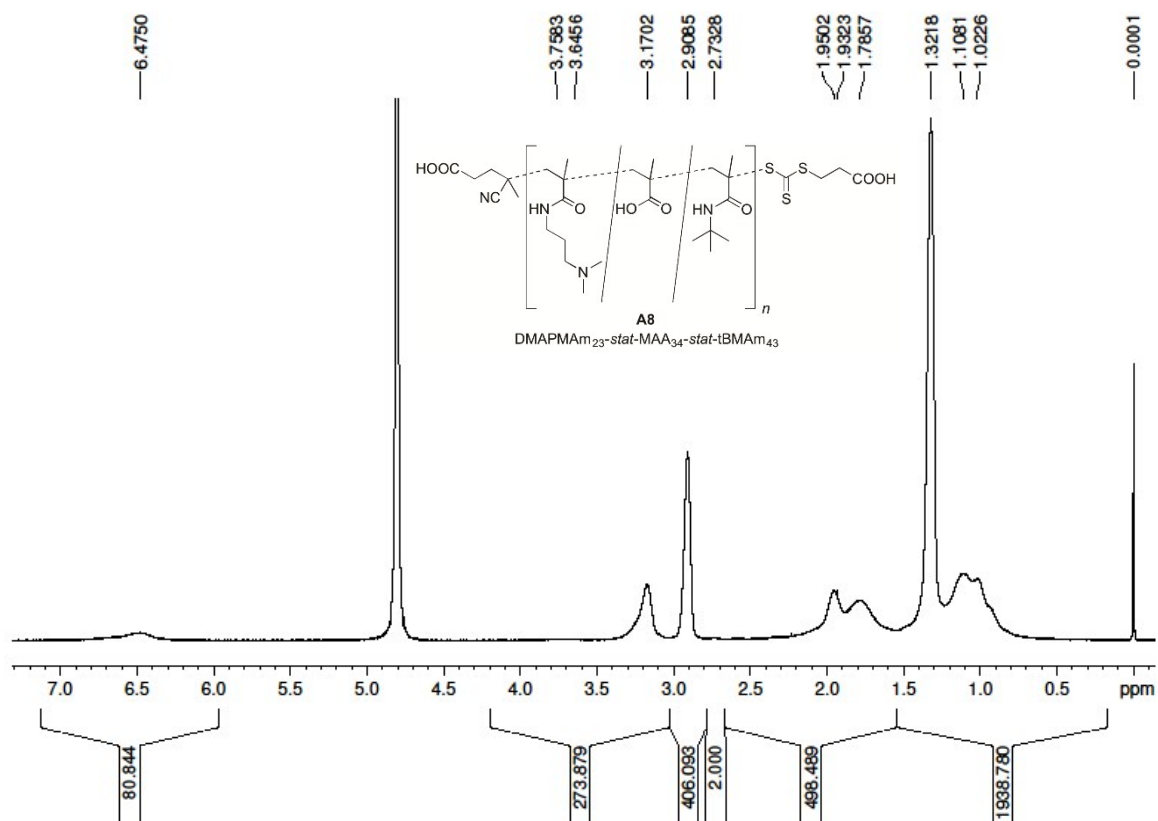

Fig. S8  $^1\text{H}$  NMR spectrum of polymer A8 ( $\text{D}_2\text{O}$ ).

#### 4. Mole fraction of monomer vs. conversion

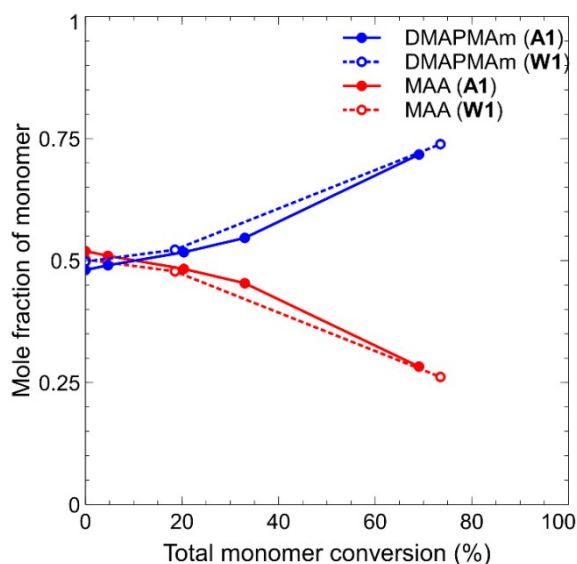

**Fig. S9** Mole fraction of monomer as a function of total monomer conversion (%) for polymers **A1** and **W1**, as determined by  $^1\text{H}$  NMR analysis of reaction aliquots. Data points are coloured according to monomer: red-MAA; blue-DMAPMAm; black-tBMAm and are connected *via* solid lines (acetic acid-synthesised polymers) or dotted lines (water-synthesised polymers).

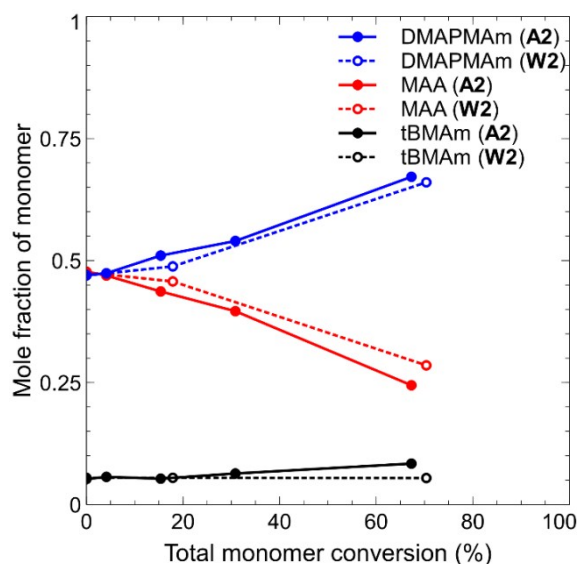

**Fig. S10** Mole fraction of monomer as a function of total monomer conversion (%) for polymers **A2** and **W2**, as determined by  $^1\text{H}$  NMR analysis of reaction aliquots. Data points are coloured according to monomer: red-MAA; blue-DMAPMAm; black-tBMAm and are connected *via* solid lines (acetic acid-synthesised polymers) or dotted lines (water-synthesised polymers).

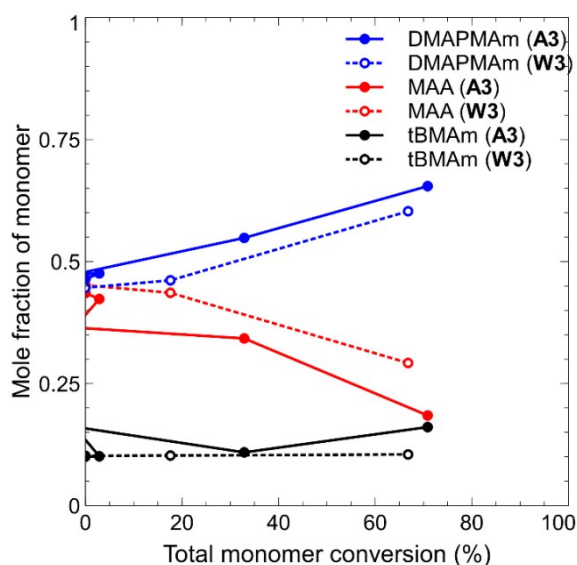

**Fig. S11** Mole fraction of monomer as a function of total monomer conversion (%) for polymers **A3** and **W3**, as determined by  $^1\text{H}$  NMR analysis of reaction aliquots. Data points are coloured according to monomer: red-MAA; blue-DMAPMAm; black-tBMAm and are connected *via* solid lines (acetic acid-synthesised polymers) or dotted lines (water-synthesised polymers).

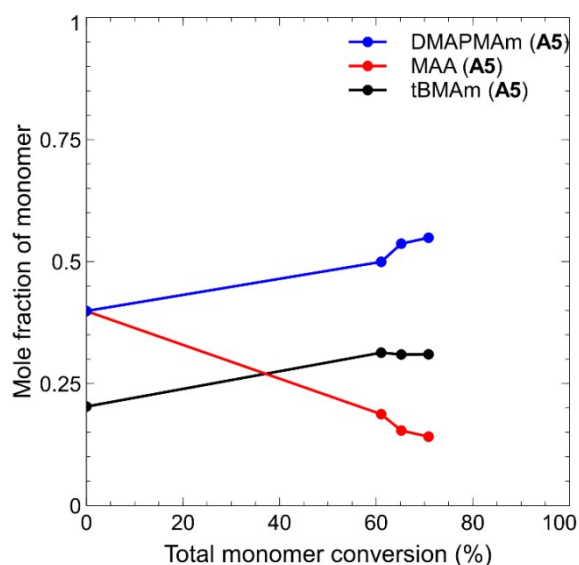

**Fig. S12** Mole fraction of monomer as a function of total monomer conversion (%) for polymers **A5**, as determined by  $^1\text{H}$  NMR analysis of reaction aliquots. Data points are coloured according to monomer: red-MAA; blue-DMAPMAm; black-tBMAm.

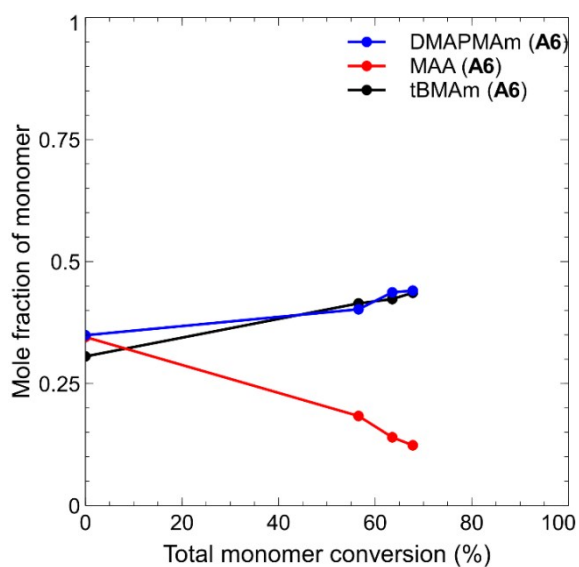

**Fig. S13** Mole fraction of monomer as a function of total monomer conversion (%) for polymers **A6**, as determined by  $^1\text{H}$  NMR analysis of reaction aliquots. Data points are coloured according to monomer: red-MAA; blue-DMAPMAm; black-tBMAm.

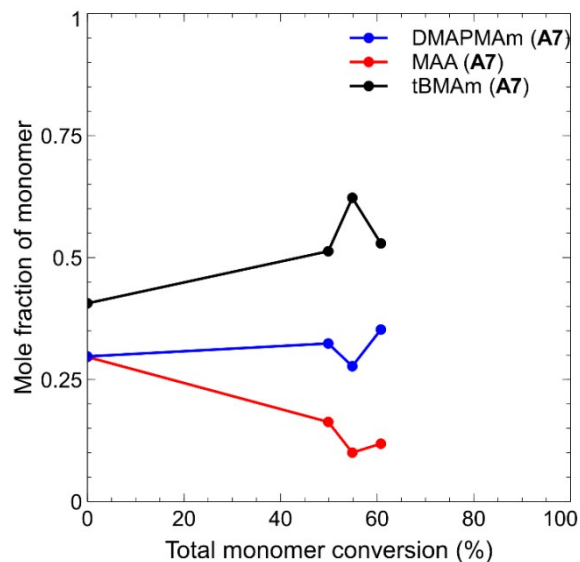

**Fig. S14** Mole fraction of monomer as a function of total monomer conversion (%) for polymers **A7**, as determined by  $^1\text{H}$  NMR analysis of reaction aliquots. Data points are coloured according to monomer: red-MAA; blue-DMAPMAm; black-tBMAm.

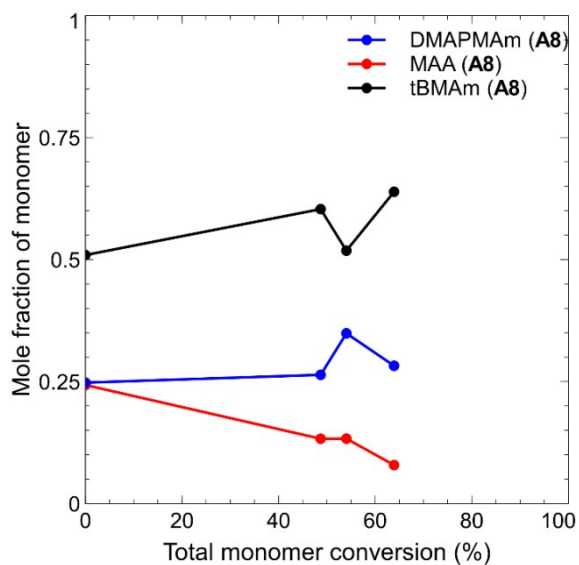

**Fig. S15** Mole fraction of monomer as a function of total monomer conversion (%) for polymers **A8**, as determined by  $^1\text{H}$  NMR analysis of reaction aliquots. Data points are coloured according to monomer: red-MAA; blue-DMAPMAm; black-tBMAm.

## 5. Temperature dependence of the transmittance (%) curves of polymers A1-A8 at 2.5, 5.0 and 10.0 mg mL<sup>-1</sup>

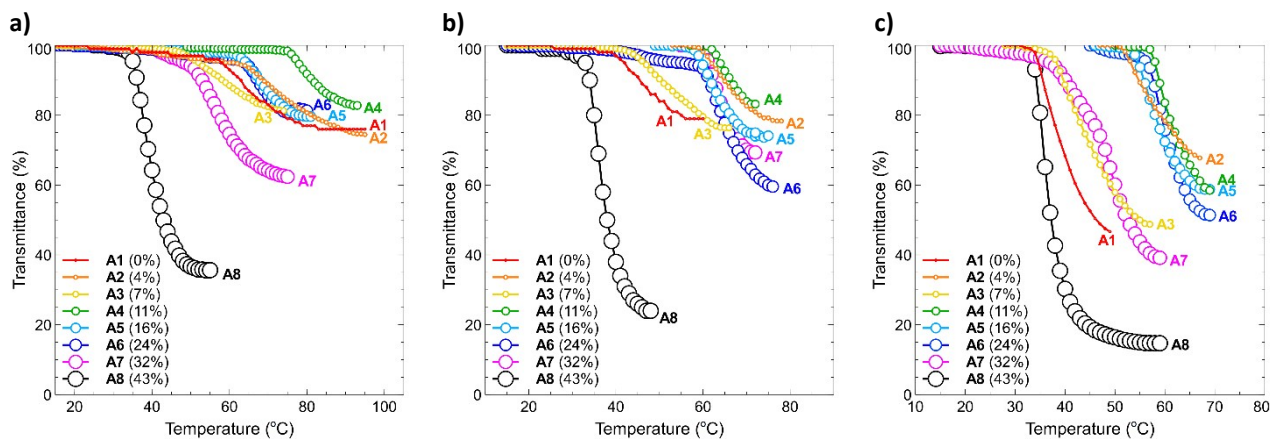

**Fig. S16** Temperature dependence of the transmittance (%) of 2.5 mg mL<sup>-1</sup> (a), 5 mg mL<sup>-1</sup> (b), and 10 mg mL<sup>-1</sup> (c) solutions of polymers **A1-A8** in Milli-Q grade water. Data point sizes and colours are set according to the relevant incorporation of tBMAM into each polymer, as indicated in the brackets (%).

## 6. $T_{CP}$ ( $^{\circ}C$ ) vs. molar ratio of tBMAM (%) of polymers A5-A8 at 2.5, 5.0 and 10.0 $mg\ mL^{-1}$

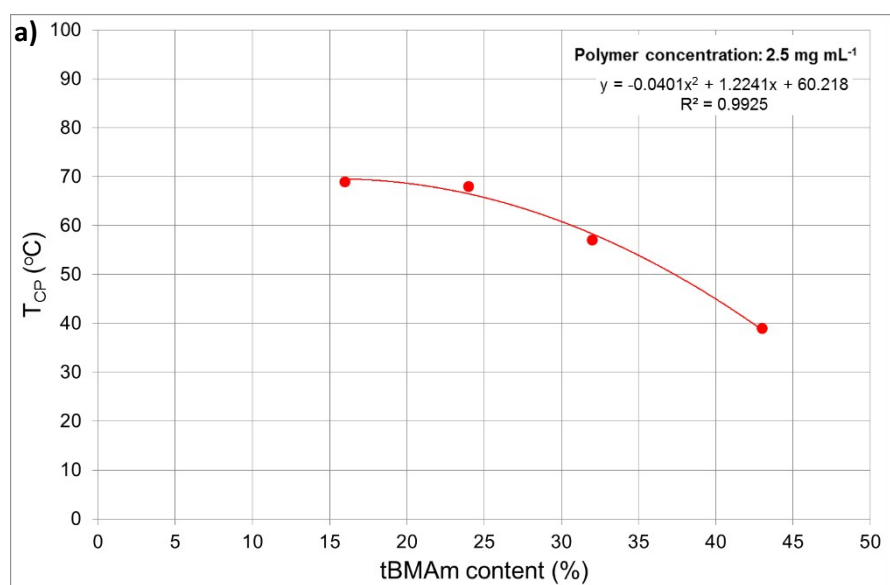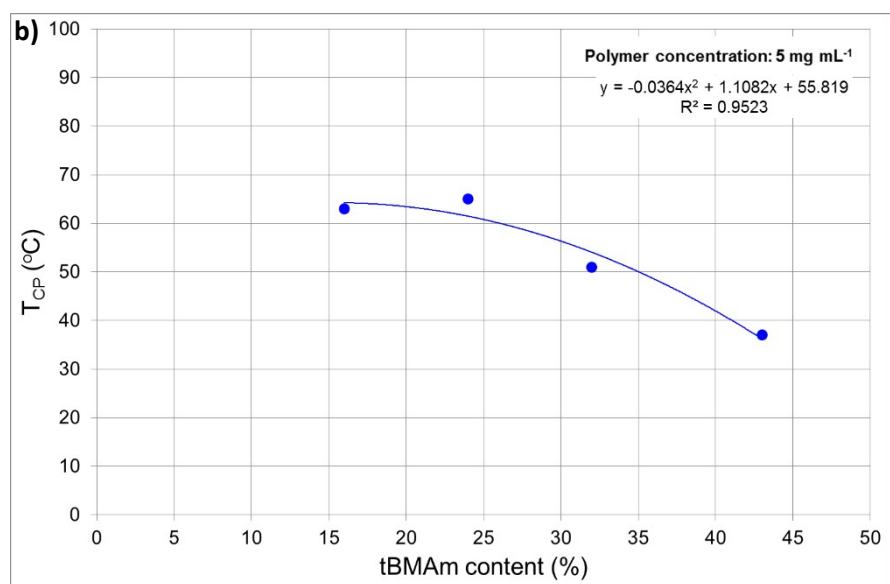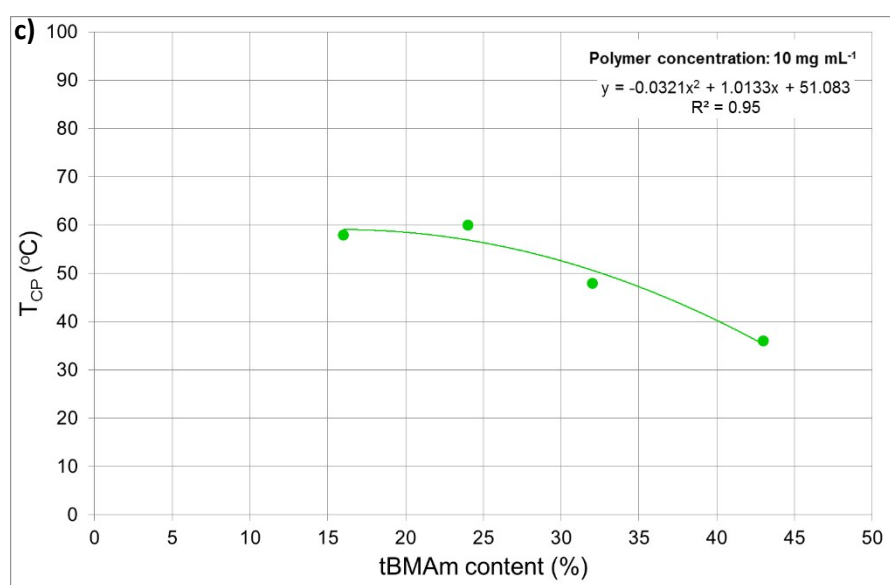

**Fig. S17**  $T_{CP}$  ( $^{\circ}C$ ) vs. molar ratio of tBMAM content (%) in polymers A5-A8 at (a) 2.5  $mg\ mL^{-1}$ , (b) 5.0  $mg\ mL^{-1}$ , (c) 10.0  $mg\ mL^{-1}$ . A clear correlation is observed between decreasing  $T_{CP}$  and increasing tBMAM content.

## 7. The $^1\text{H}$ NMR spectra of polymer A8 in the presence and absence of salt at various temperatures

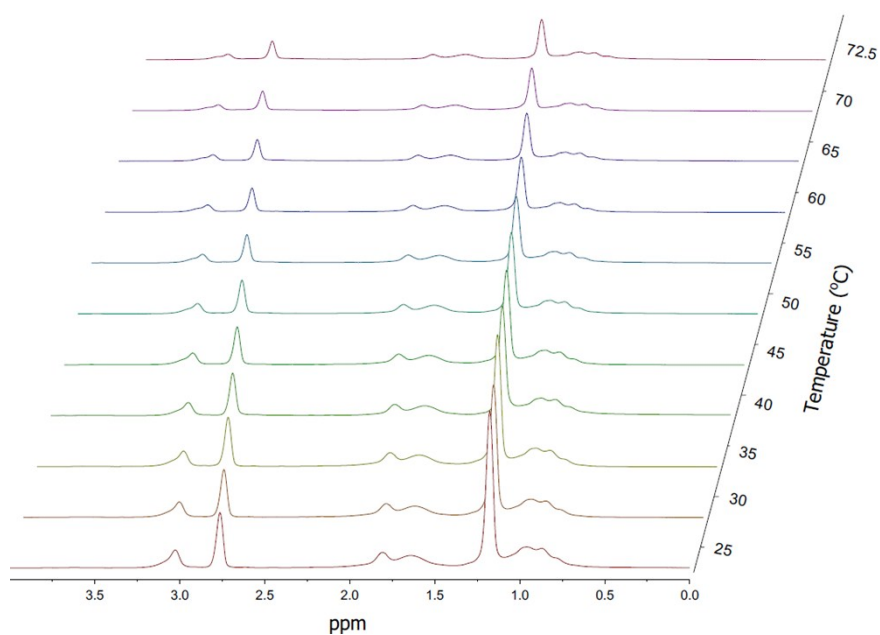

**Fig. S18**  $^1\text{H}$  NMR spectra of polymer **A8** ( $10 \text{ mg mL}^{-1}$  solution in  $\text{D}_2\text{O}$ ) at  $5 \text{ }^\circ\text{C}^*$  temperature intervals between  $25 \text{ }^\circ\text{C}$  to  $72.5 \text{ }^\circ\text{C}$ . (\*final interval is  $2.5 \text{ }^\circ\text{C}$ )

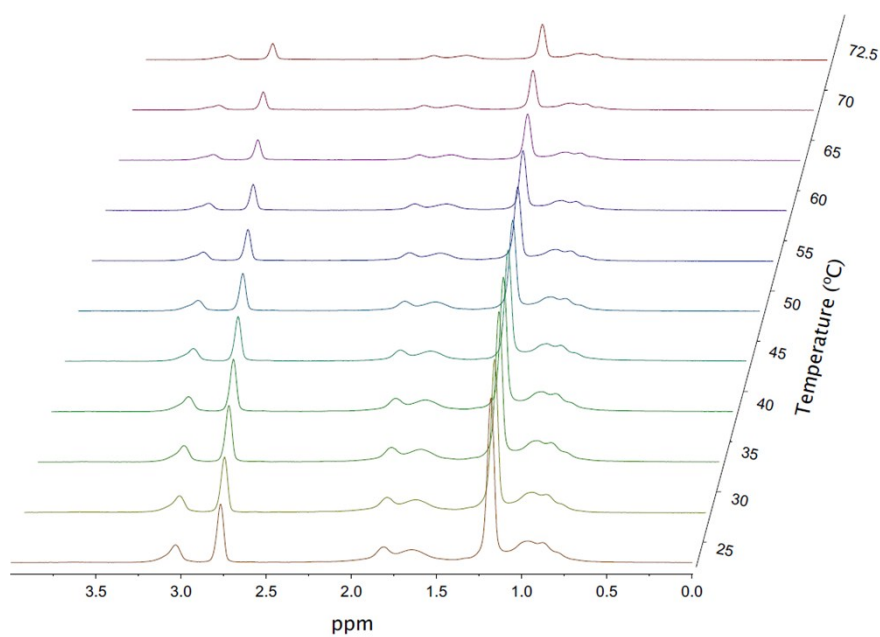

**Fig. S19**  $^1\text{H}$  NMR spectra of polymer **A8** ( $10 \text{ mg mL}^{-1}$  solution in  $\text{D}_2\text{O}$ ,  $10 \text{ mM NaCl}$ ) at  $5 \text{ }^\circ\text{C}^*$  temperature intervals between  $25 \text{ }^\circ\text{C}$  to  $72.5 \text{ }^\circ\text{C}$ . (\*final interval is  $2.5 \text{ }^\circ\text{C}$ ).
